# Supplementary material for: The First Contact of Human Dendritic Cells With Trypanosoma cruzi Reveals Response to Virus as an Unexplored Central Pathway
Source: Front Immunol. 2021 Apr 9;12:638020. doi: 10.3389/fimmu.2021.638020 (PMC8062726; doi:10.3389/fimmu.2021.638020)
Supplement: Supplementary file 2 [file Table_1.xlsx]

## Sheet: Hoja1
Antigen	Donor A	Donor B	Donor C	Donor D	Donor E	Donor F
Measles	2	5	6	1	3	2
Poliomyelitis	4	4	4	4	5	12
Hepatitis B	3	3	3	1	1	3
Mumps	1	3	4	1	1	0
Yellow fever	2	1	1	1	1	3
Influenza	0	0	1	0	0	3
H1N1	0	2	1	0	0	0
Hepatitis A	0	0	0	1	1	0
Rabies	0	0	3	0	0	0
Rubella	1	4	4	1	1	1
Varicella	0	1	1	0	1	1
Tetanus	6	8	5	4	4	5
Diphtheria	6	4	4	3	4	5
Pertussis	4	4	4	4	4	4
Tuberculosis	1	1	1	1	1	1
Total viral immunizations	13	23	28	10	14	25		Mean	18.8333
Total bacterial immunizations	17	17	14	12	13	15		Mean	14.6667
